# Supplementary material for: Antimalarial activity of ruthenium(ii) and osmium(ii) arene complexes with mono- and bidentate chloroquine analogue ligands
Source: Royal Society of Chemistry journal article supplement (doi:10.1039/c5dt02410b), 2015-01-01
Supplement: c5dt02410b1.pdf [file c5dt02410b1.pdf]

## Supporting Information

### Antimalarial activity of ruthenium(II) and osmium(II) arene complexes with mono- and bidentate chloroquine analogue ligands

Erik Ekengard<sup>a</sup>, Lotta Glans<sup>a</sup>, Irwin Cassells<sup>b</sup>, Thibault Fogeron<sup>a</sup>, Preshendren Govender<sup>b</sup>, Tameryn Stringer<sup>b</sup>, Prinessa Chellan<sup>b</sup>, George Lisensky<sup>f</sup>, William H. Hersk<sup>d</sup>, Isa Doverbratt<sup>e</sup>, Sven Lidin<sup>e</sup>, Carmen de Kock<sup>f</sup>, Peter J. Smith<sup>f</sup>, Gregory S. Smith<sup>b\*</sup>, Ebbe Nordlander<sup>a\*</sup>

- a) Inorganic Chemistry Research Group, Chemical Physics, Department of Chemistry, Lund University, Box 124, SE-221 00 Lund, Sweden. E-mail: ebbe.nordlander@chemphys.lu.se
- b) Department of Chemistry, University of Cape Town, Private Bag, Rondebosch 7701, South Africa. E-mail: gregory.smith@uct.ac.za
- c) Department of Chemistry, Beloit College, 700 College St., Beloit, WI 53511, USA.
- d) Department of Chemistry and Biochemistry, Queens College and the Graduate Center of the City University of New York, Queens, NY 11367-1597, USA.
- e) Centre for Analysis and Synthesis, Department of Chemistry, Lund University, Getingevägen 60, Box 124, SE-22100 Lund, Sweden.
- f) Division of Pharmacology, Department of Medicine, University of Cape Town Medical School, Observatory 7925, South Africa

\* To whom correspondence should be addressed.

## Contents

|                                                                                                          |    |
|----------------------------------------------------------------------------------------------------------|----|
| Electrochemistry                                                                                         | S2 |
| Anti-malarial activities as a function of $\sigma_{\text{para}}$                                         | S4 |
| <sup>1</sup> H-NMR assignments used in the characterization of Ru-HL <sup>9</sup> and Os-HL <sup>9</sup> | s5 |
| Stacking fault in Ru-1                                                                                   | s6 |

## Electrochemistry

**Table S-1.** Oxidation potentials for Ru complexes.

| Complex                              | Volts vs Ferrocene | Hammet value |
|--------------------------------------|--------------------|--------------|
| Ru-HL <sup>7</sup> , OMe             | 0.2568             | -0.268       |
| Ru-HL <sup>2</sup> , F               | 0.4972             | 0.062        |
| Ru-HL <sup>3</sup> , Cl              | 0.5439             | 0.227        |
| Ru-HL <sup>5</sup> , I               | 0.5957             | 0.276        |
| Ru-HL <sup>6</sup> , NO <sub>2</sub> | 0.7795             | 0.778        |

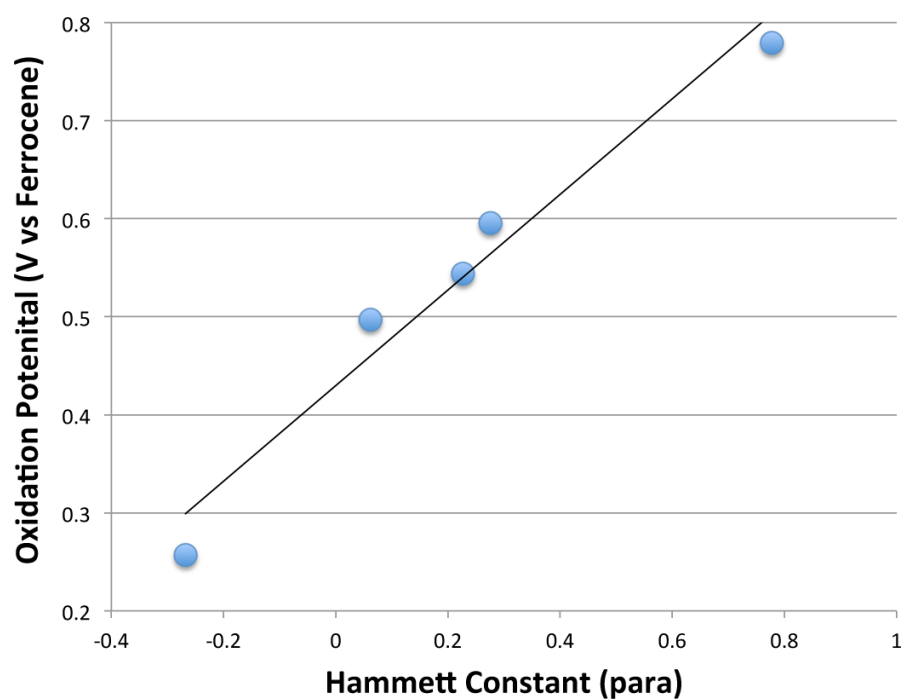

**Figure S-1.** The oxidation potentials for Ru<sup>II</sup> to Ru<sup>III</sup> correlate with the Hammett constants, as the greater electron-withdrawing groups raise the oxidation potential. The data is also shown in Table 1.

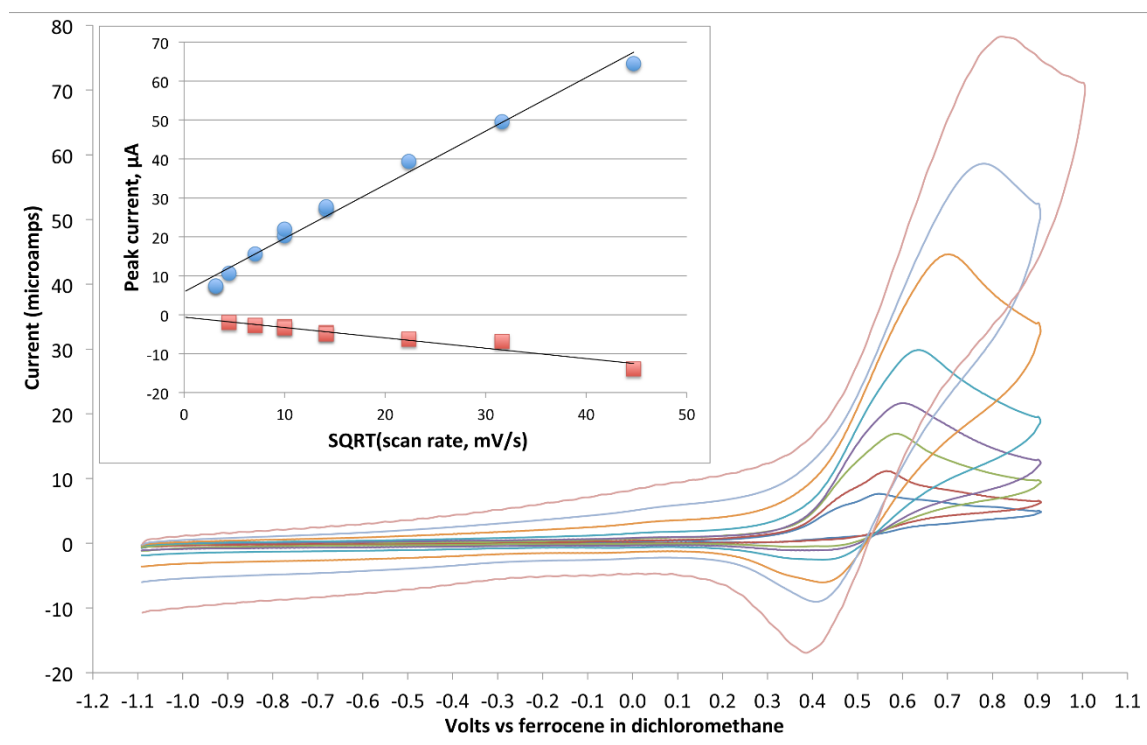

**Figure S-2.** The ruthenium complexes have a quasi-reversible oxidation with the cyclic voltammetry return wave having a smaller peak current. The figure shows the data for Ru-HL<sup>2</sup> at 10, 20, 50, 100, 200, 500, 1000, and 2000 mV/s scan rates. The peak current for the return wave is only 20% of that for the forward wave.

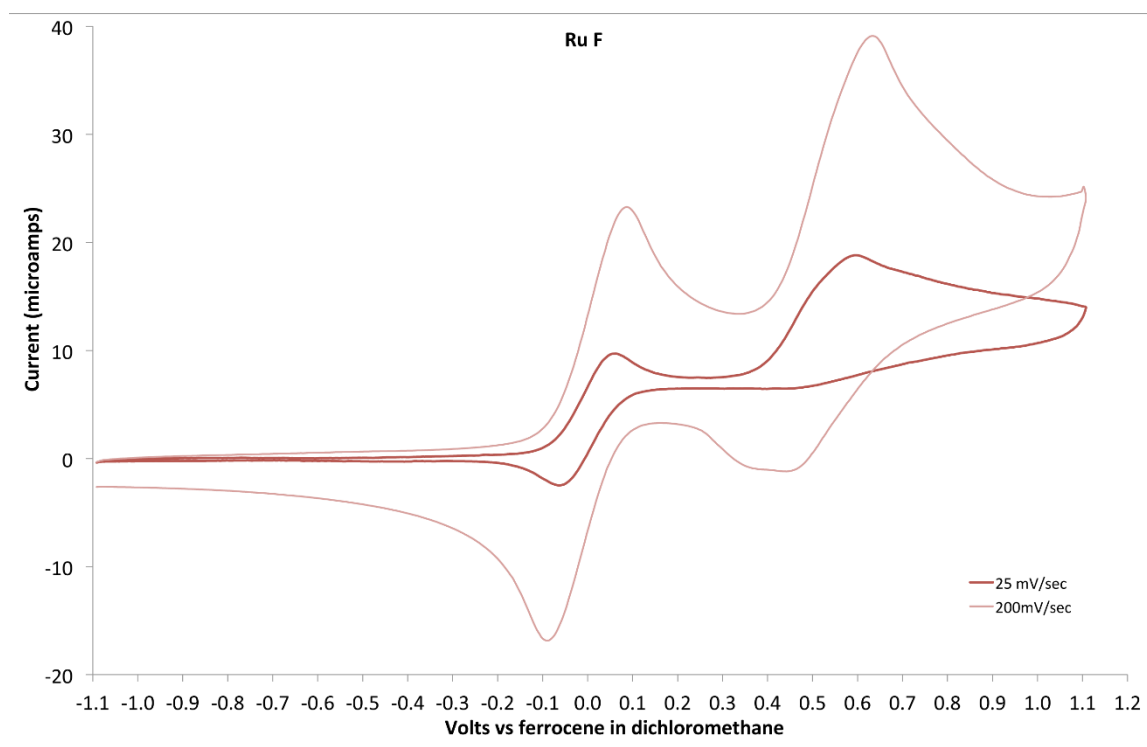

**Figure S-3.** Peak separations were similar to that of ferrocene. The cyclic voltammogram of Ru-HL<sup>2</sup> in dichloromethane is shown with added ferrocene at 25 and 200 mV/s scan rates.

## Anti-malarial activities as a function of $\sigma_{\text{para}}$

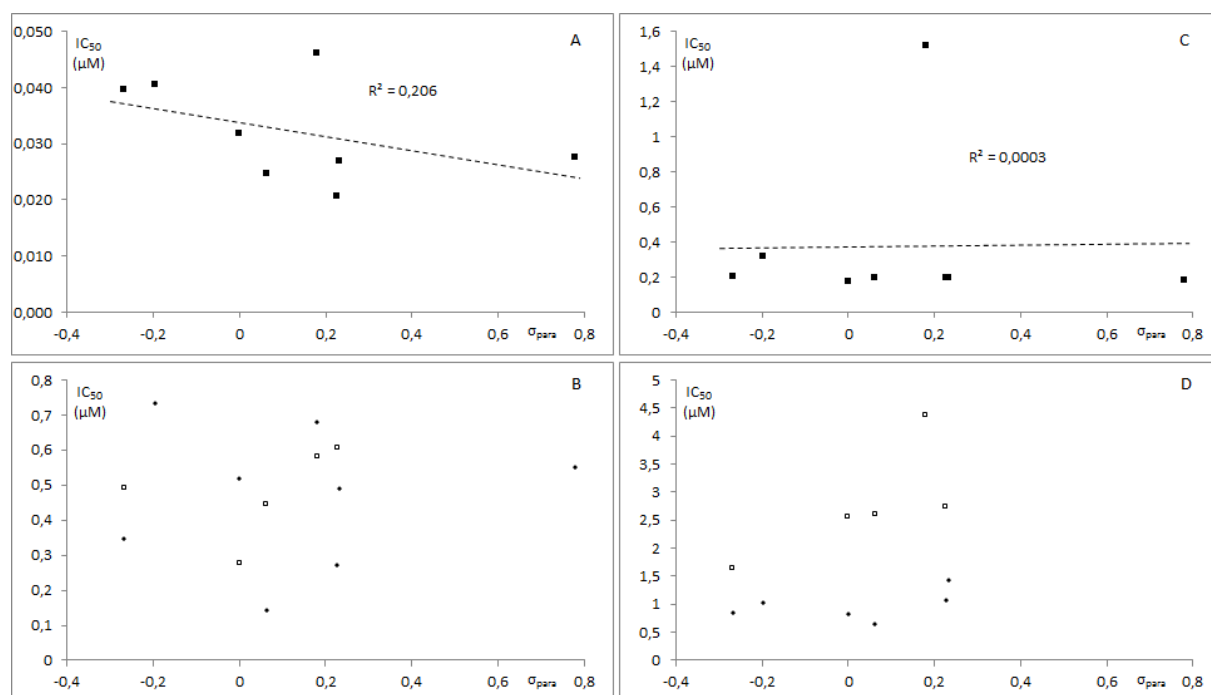

**Figure S-4.** Antimalarial activities as a function of Hammett  $\sigma_{\text{para}}$  values. A) Ligands **HL**<sup>1</sup> to **HL**<sup>8</sup> (solid squares), NF54 strain (CQS), B) Complexes **Ru**-1 to 8 (solid diamonds) and **Os**-1,2,3,5 and 7 (white squares) NF54 strain (CQS), C) Ligands **HL**<sup>1</sup> to **HL**<sup>8</sup> (solid squares), Dd2 strain (CQR), D) Complexes **Ru**-1 to 8 (solid diamonds) and **Os**-1,2,3,5 and 7 (white squares), Dd2 strain (CQR). Notice the weak negative correlation between antimalarial activity versus the CQS strain for the ligands **HL**<sup>1</sup> to **HL**<sup>8</sup> and the absence of the same trend in the the corresponding complexes.

**$^1\text{H}$ -NMR assignments used in the characterization of Ru-HL<sup>9</sup> and Os-HL<sup>9</sup>****Table S-2.** Selected  $^1\text{H}$  NMR data ( $\Delta\delta$ , ppm) for complexes Ru-HL<sup>9</sup> and Os-HL<sup>9</sup> in  $\text{CD}_2\text{Cl}_2$ .<sup>a</sup>

|     | Ru-HL <sup>9</sup> | Os-HL <sup>9</sup> |
|-----|--------------------|--------------------|
| H1  | 0.03               | 0.04               |
| H3  | -0.04              | -0.05              |
| H5  | 0.00               | 0.00               |
| H8  | -0.03              | -0.04              |
| H9  | -0.10              | -0.18              |
| H11 | 0.31               | 0.33               |
| H12 | -0.34              | -0.35              |
| H14 | 0.68               | 0.77               |
| H16 | -0.35              | -0.43              |
| H17 | -0.36              | -0.48              |
| H29 | 0.01               | -0.01              |
| H30 | -0.02              | -0.02              |
| H31 | 0.09               | 0.14               |

<sup>a</sup>  $\Delta\delta$  is the displacement of the signal in the coordinated ligand with respect to the corresponding signal in the free ligand. Positive values denote downfield shifts. See figure S-5 for numbering.

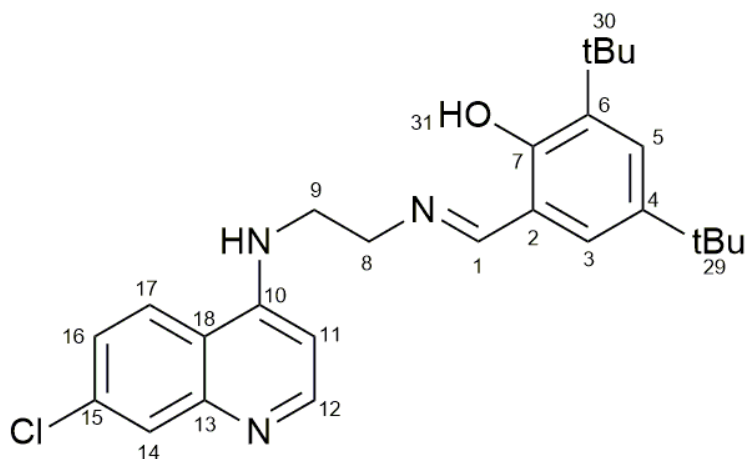

**Figure S-5.** Numbering scheme used for  $^1\text{H}$ -NMR assignments in Table S-2. The same numbering is used for all crystal structures.

## Stacking fault in Ru-1

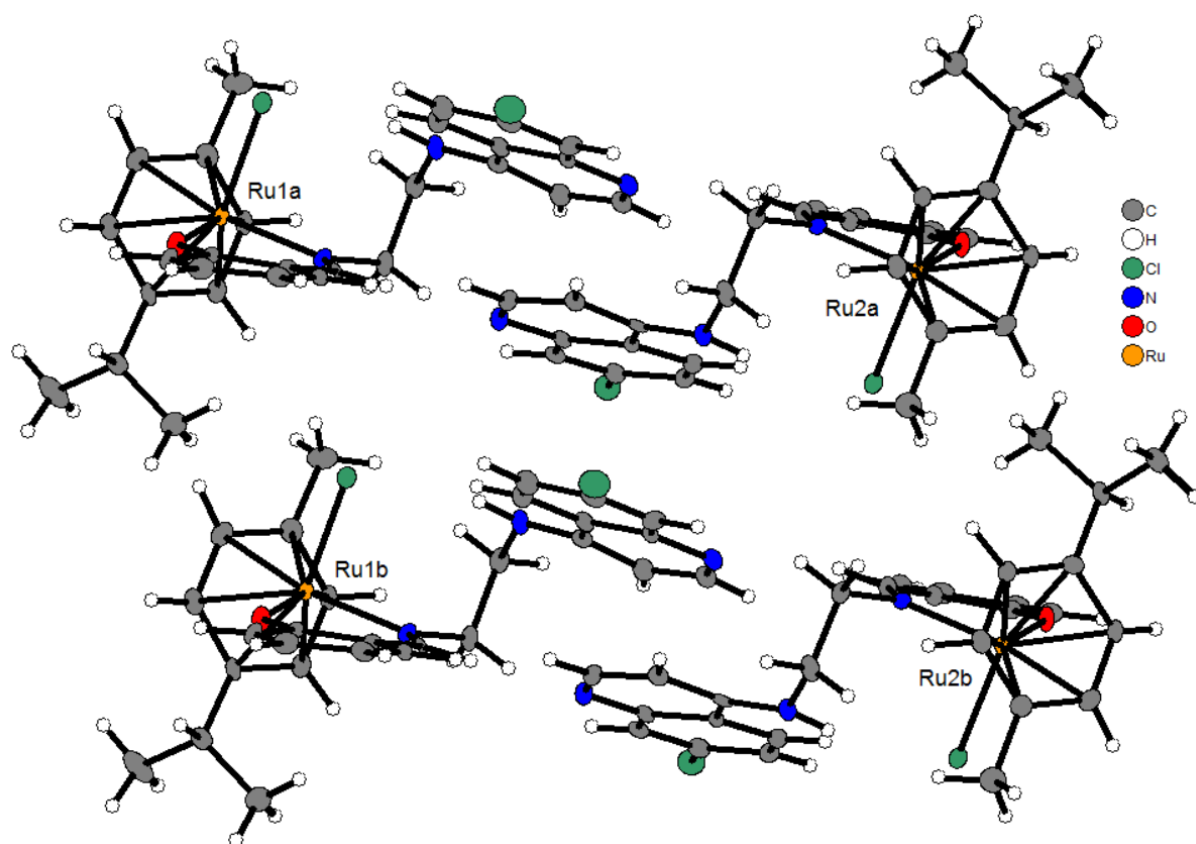

**Figure S-6.** Structure of the two different domains of Ru-1. Ru1a and Ru2a is in the main polymorph, Ru1b and Ru2b in the minor polymorph. Notice the local centrosymmetry at the interface between the polymorphs.
